# Supplementary material for: High-performance blue fluorescent/electroactive polyamide bearing p-phenylenediamine and asymmetrical SBF/TPA-based units for electrochromic and electrofluorochromic multifunctional applications
Source: Royal Society of Chemistry journal article supplement (doi:10.1039/c9tc00326f), 2019-01-01
Supplement: c9tc00326f1.pdf [file c9tc00326f1.pdf]

## Supporting Information for

### High-performance blue fluorescent/electroactive polyamide bearing *p*-phenylenediamine and asymmetrical SBF/TPA-based units for electrochromic and electrofluorochromic multifunctional applications

|                                                                                                                                                                                                                                                       |   |
|-------------------------------------------------------------------------------------------------------------------------------------------------------------------------------------------------------------------------------------------------------|---|
| <b>Fig. S1</b> FTIR spectra of the compounds 4-nitro-4-methoxydiphenylamine, SBF-NO <sub>2</sub> , SBF-NH <sub>2</sub> , SBF-2NO <sub>2</sub> and SBF-2NH <sub>2</sub> . .....                                                                        | 2 |
| <b>Fig. S2</b> FTIR spectra of SBF-HPA and SBF-DPA. ....                                                                                                                                                                                              | 2 |
| <b>Fig. S3</b> <sup>1</sup> H NMR spectra of SBF-HPA and SBF-DPA. ....                                                                                                                                                                                | 3 |
| <b>Fig. S4</b> DSC curves of SBF-HPA and SBF-DPA. ....                                                                                                                                                                                                | 3 |
| <b>Fig. S5</b> TGA curves of SBF-HPA and SBF-DPA. ....                                                                                                                                                                                                | 4 |
| <b>Fig. S6</b> (a) Cyclic voltammetric diagrams of SBF-DPA at a scan rate of 50 mV s <sup>-1</sup> . (b) Absorbance spectra of SBF-DPA thin film electrode in 0.1 M TBAP/CH <sub>3</sub> CN at different applied potentials from 0.00 to 1.15 V. .... | 4 |
| <b>Fig. S7</b> (A) EC switching of SBF-HPA film between 0.00 and 1.15 V with a cycle time of 20 s: (a) transmittance changes and (b) current consumption at the monitored wavelength of 850 nm. (B) Optical switching time at 850 nm. ....            | 5 |
| <b>Table S1.</b> Molecular Weights and Solubilities of SBF-HPA and SBF-DPA. ....                                                                                                                                                                      | 5 |
| <b>Table S2.</b> Thermal properties of SBF-HPA and SBF-DPA. ....                                                                                                                                                                                      | 5 |

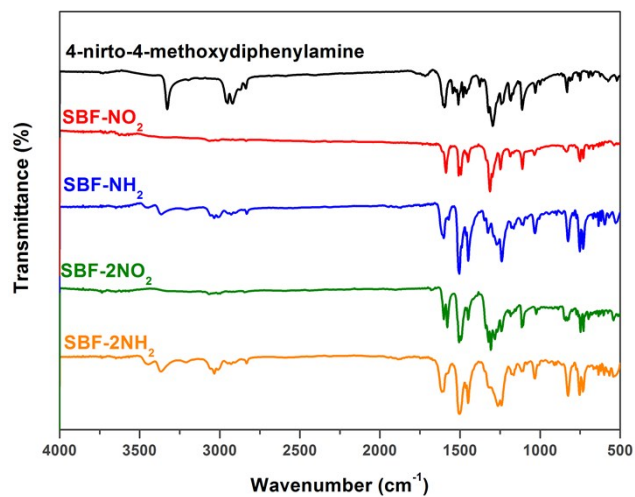

**Fig. S1** FTIR spectra of the compounds 4-nitro-4-methoxydiphenylamine, SBF- $\text{NO}_2$ , SBF- $\text{NH}_2$ , SBF- $2\text{NO}_2$  and SBF- $2\text{NH}_2$ .

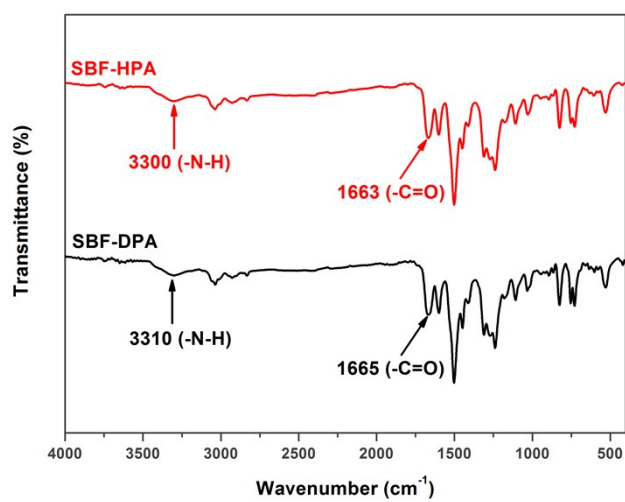

**Fig. S2** FTIR spectra of SBF-HPA and SBF-DPA.

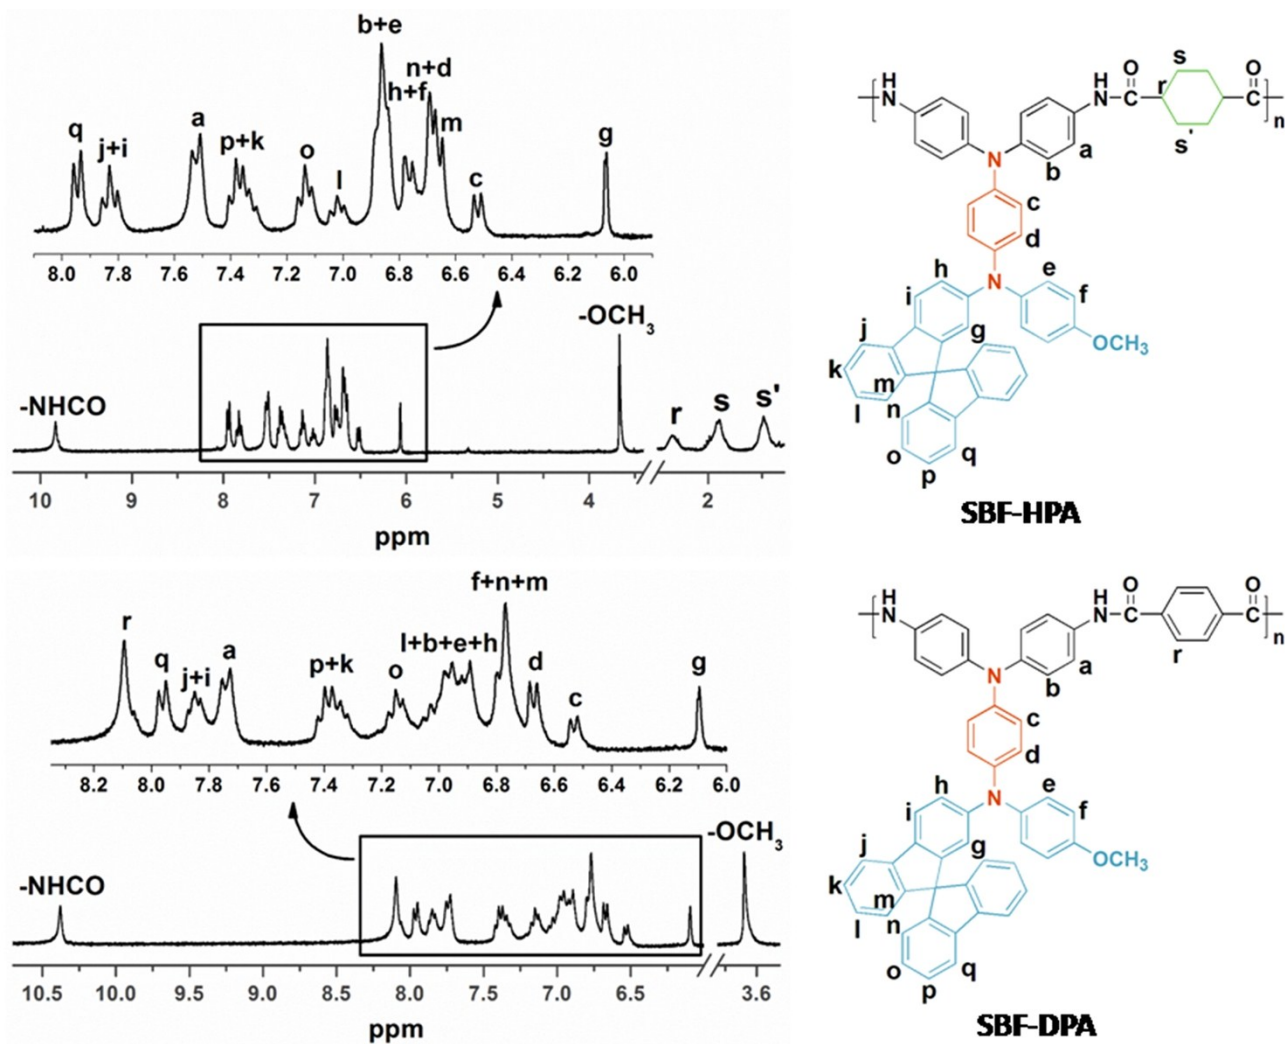

Fig. S3  $^1\text{H}$  NMR spectra of SBF-HPA and SBF-DPA.

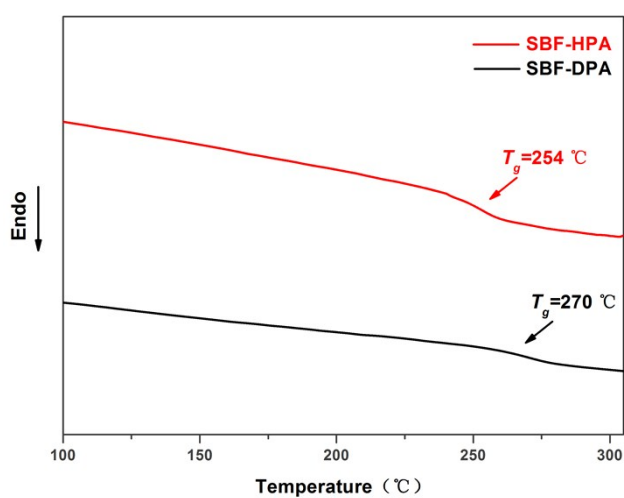

Fig. S4 DSC curves of SBF-HPA and SBF-DPA.

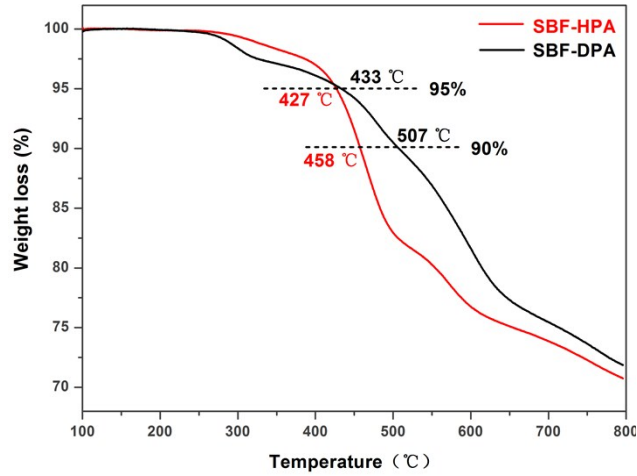

**Fig. S5** TGA curves of SBF-HPA and SBF-DPA.

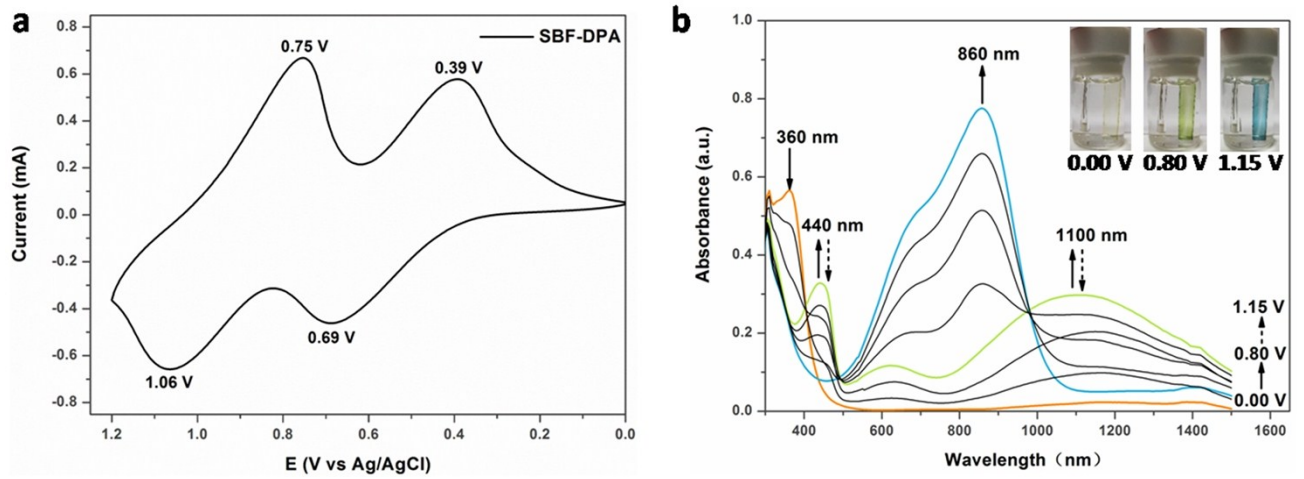

**Fig. S6** (a) Cyclic voltammetric diagrams of SBF-DPA at a scan rate of 50 mV s<sup>-1</sup>. (b) Absorbance spectra of SBF-DPA thin film electrode in 0.1 M TBAP/CH<sub>3</sub>CN at different applied potentials from 0.00 to 1.15 V.

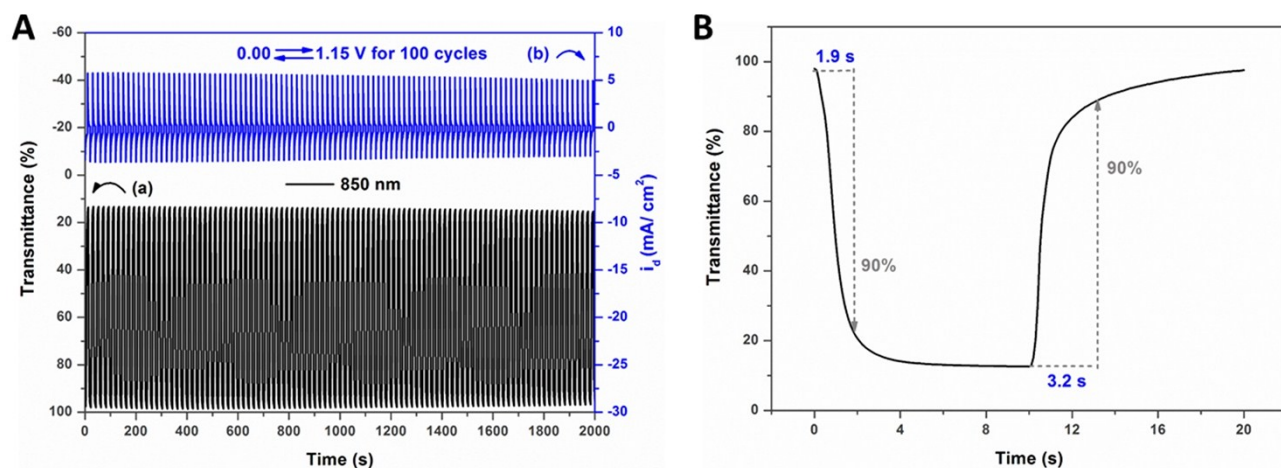

**Fig. S7** (A) EC switching of SBF-HPA film between 0.00 and 1.15 V with a cycle time of 20 s: (a) transmittance changes and (b) current consumption at the monitored wavelength of 850 nm. (B) Optical switching time at 850 nm.

**Table S1.** Molecular Weights and Solubilities of SBF-HPA and SBF-DPA.

| Sample  | GPC <sup>a</sup> |       |      | Solvents <sup>b</sup> |                  |     |      |     |                   |                    |
|---------|------------------|-------|------|-----------------------|------------------|-----|------|-----|-------------------|--------------------|
|         | $M_w$            | $M_n$ | PDI  | NMP                   | DMA <sub>c</sub> | DMF | DMSO | THF | CHCl <sub>3</sub> | CH <sub>3</sub> CN |
| SBF-HPA | 9530             | 9200  | 1.04 | ++                    | ++               | ++  | ++   | ++  | +-                | --                 |
| SBF-DPA | 5560             | 4020  | 1.38 | ++                    | ++               | ++  | ++   | ++  | +-                | --                 |

<sup>a</sup> Relative to polystyrene standard, using DMF as the eluent. <sup>b</sup> Qualitative solubilities were tested with 10 mg of polymers in 1 mL of solvent. ++, soluble at room temperature; +-, partially soluble; --, insoluble even on heating.

**Table S2.** Thermal properties of SBF-HPA and SBF-DPA.

| Sample  | $T_g$ (°C) <sup>a</sup> | N <sub>2</sub>               |                               | Char yield (wt %) <sup>c</sup> |
|---------|-------------------------|------------------------------|-------------------------------|--------------------------------|
|         |                         | $T_{d5\%}$ (°C) <sup>b</sup> | $T_{d10\%}$ (°C) <sup>b</sup> |                                |
| SBF-HPA | 254                     | 427                          | 458                           | 71                             |
| SBF-DPA | 270                     | 433                          | 507                           | 72                             |

<sup>a</sup> Obtained at the baseline shift in the second heating DSC traces, with a heating rate of 10 °C/min under N<sub>2</sub>.

<sup>b</sup> Decomposition temperature at which a 5 or 10% weight loss was recorded *via* TGA at a heating rate of 10 °C/min.

<sup>c</sup> Residual weight percentage at 800 °C in N<sub>2</sub>.
